# Supplementary material for: Rare Pediatric Cerebellar High-Grade Gliomas Mimic Medulloblastomas Histologically and Transcriptomically and Show p53 Mutations
Source: MDPI journal article supplement (doi:10.3390/cancers16010232), 2024-01-04
Supplement: s1 [file s1]

**Table S1.** Clinical features of the five cases.

| Case | Sex | Age | Symptoms                                                           | MRI                   | Treatment                                                                     | Outcome   |
|------|-----|-----|--------------------------------------------------------------------|-----------------------|-------------------------------------------------------------------------------|-----------|
| 1    | M   | 13  | Headache, vomiting                                                 | 4th ventricular tumor | GTR → CSI → Chemo                                                             | NED (6m)  |
| 2    | F   | 13  | Headache, diplopia                                                 | L CB/CPA lesion       | STR → CSI + carbo/VCR → Chemo x 4 cycles → PD                                 | DOD (12m) |
| 3    | M   | 9   | ALL survivor, history of cranial RT, headache, weakness, imbalance | R CB/CPA lesion       | GTR → CSI → Chemo → PD                                                        | DOD (9m)  |
| 4    | F   | 9   | LLL weakness, imbalance                                            | L CB/CPA lesion       | GTR → Chemo x 1 cycle → PD 4 months from 1 <sup>st</sup> surgery → second GTR | DOD (12m) |
| 5    | M   | 10  | Headache, dizziness, vomiting                                      | CB lesion             | GTR                                                                           | DOD (5m)  |

LLL, left lower limb weakness; ALL, acute lymphoblastic leukaemia; CB, cerebellum; CPA, cerebellopontine angle; STR, subtotal resection; GTR, gross total resection; CSI : craniospinal irradiation; PD, progressive disease; DOD, died of disease; NED, no evidence of disease.

**Table S2.** List of genes used in target sequencing panel.

|         |        |        |        |        |        |          |         |          |          |         |         |         |         |          |         |
|---------|--------|--------|--------|--------|--------|----------|---------|----------|----------|---------|---------|---------|---------|----------|---------|
| ABCB1   | ABCC4  | ABCG2  | ABL1   | ABL2   | ACVR1B | AKT1     | AKT2    | AKT3     | ALK      | ALOX12B | AMER1   | APC     | APCDD1  | AR       | ARAF    |
| ARFRP1  | ARID1A | ARID1B | ARID2  | ASXL1  | ATM    | ATR      | ATRX    | AURKA    | AURKB    | AXIN1   | AXL     | BACH1   | BAP1    | BARD1    | BCL2    |
| BCL2A1  | BCL2L1 | BCL2L2 | BCL6   | BCOR   | BCORL1 | BLM      | BMPR1A  | BRAF     | BRCA1    | BRCA2   | BRD4    | BRIP1   | BTG1    | C11orf30 | CARD11  |
| CASP8   | CBFB   | CBL    | CCND1  | CCND2  | CCND3  | CCNE1    | CD274   | CD79A    | CD79B    | CDC73   | CDH1    | CDH2    | CDH20   | CDH5     | CDK12   |
| CDK4    | CDK6   | CDK8   | CDKN1A | CDKN1B | CDKN2A | CDKN2B   | CDKN2C  | CEBPA    | CHD2     | CHD4    | CHEK1   | CHEK2   | CHUK    | CIC      | CRBN    |
| CREBBP  | CRKL   | CSF1R  | CTCF   | CTNNA1 | CTNNB1 | CUL3     | CUL4A   | CYLD     | CYP17A1  | CYP2C8  | CYP3A4  | CYP3A5  | DAXX    | DDR1     | DDR2    |
| DICER1  | DIS3   | DNMT3A | DOT1L  | DPYD   | EGFR   | EP300    | EPCAM   | EPHA3    | EPHA5    | EPHA6   | EPHA7   | EPHB1   | EPHB4   | EPHB6    | ERBB2   |
| ERBB3   | ERBB4  | ERCC2  | ERCC4  | ERG    | ERRFI1 | ESR1     | EZH2    | FAM175A  | FAM46C   | FANCA   | FANCC   | FANCD2  | FANCE   | FANCF    | FANCG   |
| FANCI   | FANCL  | FANCM  | FAS    | FAT1   | FAT3   | FBXW7    | FCGR3A  | FGF10    | FGF12    | FGF14   | FGF19   | FGF23   | FGF3    | FGF4     | FGF6    |
| FGF7    | FGFR1  | FGFR2  | FGFR3  | FGFR4  | FH     | FLCN     | FLT1    | FLT3     | FLT4     | FOXL2   | FOXP1   | FRS2    | FUBP1   | GABRA6   | GALNT12 |
| GATA1   | GATA2  | GATA3  | GATA4  | GATA6  | GEN1   | GID4     | GLI1    | GNA11    | GNA13    | GNAQ    | GNAS    | GPR124  | GREM1   | GRIN2A   | GRM3    |
| GSK3B   | H3F3A  | HGF    | HIF1A  | HLA-A  | HOXB13 | HRAS     | HSD3B1  | HSP90AA1 | IDH1     | IDH2    | IGF1    | IGF1R   | IGF2    | IGF2R    | IKBKE   |
| IKZF1   | IL7R   | INHBA  | INPP4B | INSR   | IKBKE  | IKZF1    | IL7R    | INHBA    | INPP4B   | INSR    | INSRR   | IRF2    | IRF4    | IRS2     | JAK1    |
| JAK2    | JAK3   | JUN    | KAT6A  | KDM5A  | KDM5C  | KDM6A    | KDR     | KEAP1    | KEL      | KIT     | KLHL6   | KMT2A   | KMT2C   | KMT2D    | KRAS    |
| LMO1    | LRP1B  | LRP2   | LRP6   | LRRK2  | LTK    | LYN      | LZTR1   | MAGI2    | MAP2K1   | MAP2K2  | MAP2K4  | MAP3K1  | MAP3K13 | MAP3K9   | MAPK1   |
| MAPK3   | MCL1   | MDM2   | MDM4   | MED12  | MEF2B  | MEN1     | MERTK   | MET      | MITF     | MKNK1   | MKNK2   | MLH1    | MPL     | MRE11A   | MSH2    |
| MSH6    | MST1R  | MTHFR  | MTOR   | MUTYH  | MYC    | MYCL     | MYCN    | MYD88    | NBN      | NCOR1   | NF1     | NF2     | NFE2L2  | NFKBIA   | NKX2-1  |
| NOTCH1  | NOTCH2 | NOTCH3 | NOTCH4 | NPM1   | NRAS   | NSD1     | NTRK1   | NTRK2    | NTRK3    | NUDT1   | NUP93   | PAK6    | PAK7    | PALB2    | PARK2   |
| PARP1   | PARP2  | PARP3  | PARP4  | PAX5   | PBRM1  | PDCD1LG2 | PDGFRA  | PDGFRB   | PDK1     | PHLPP2  | PIK3C2B | PIK3C2G | PIK3C3  | PIK3CA   | PIK3CB  |
| PIK3CG  | PIK3R1 | PIK3R2 | PLCG2  | PMS2   | PNRC1  | POLD1    | POLE    | PPARG    | PPP2R1A  | PRDM1   | PREX2   | PRKAR1A | PRKCI   | PRKDC    | PRSS1   |
| PRSS8   | PTCH1  | PTCH2  | PTEN   | PTK2   | PTK2B  | PTPN11   | PTPRD   | QK1      | RAC1     | RAD50   | RAD51   | RAD51B  | RAD51C  | RAD51D   | RAD52   |
| RAD54L  | RAF1   | RANBP2 | RARA   | RB1    | RBM10  | REL      | RET     | RhoA     | RICTOR   | RNF43   | ROS1    | RPA1    | RPTOR   | RUNX1    | RUNX1T1 |
| SDHA    | SDHB   | SDHC   | SDHD   | SETD2  | SF3B1  | SH2B3    | SLC22A2 | SLIT2    | SMAD2    | SMAD3   | SMAD4   | SMARCA4 | SMARCB1 | SMARCD1  | SMO     |
| SNCAIP  | SOCS1  | SOX10  | SOX2   | SOX9   | SPEN   | SPOP     | SPTA1   | SRC      | STAG2    | STAT3   | STAT4   | STK11   | SUFU    | SULT1A1  | SYK     |
| TAF1    | TBX3   | TEK    | TERT ^ | TET2   | TGFBR2 | TIPARP   | TNF     | TNFAIP3  | TNFRSF14 | TNKS    | TNKS2   | TOE1    | TOP1    | TOP2A    | TP53    |
| TP53BP1 | TPMT   | TRRAP  | TSC1   | TSC2   | TSHR   | TYRO3    | U2AF1   | UGT1A1   | UGT1A7   | UMPS    | VEGFA   | VHL     | WISP3   | WT1      | XPO1    |
| XRCC2   | XRCC3  | ZBTB2  | ZNF217 | ZNF703 | ZNRF3  |          |         |          |          |         |         |         |         |          |         |

^ promoter region
