# Supplementary material for: Rare Pediatric Cerebellar High-Grade Gliomas Mimic Medulloblastomas Histologically and Transcriptomically and Show p53 Mutations
Source: MDPI journal article supplement (doi:10.3390/cancers16010232), 2024-01-04
Supplement: s1 [file s1]

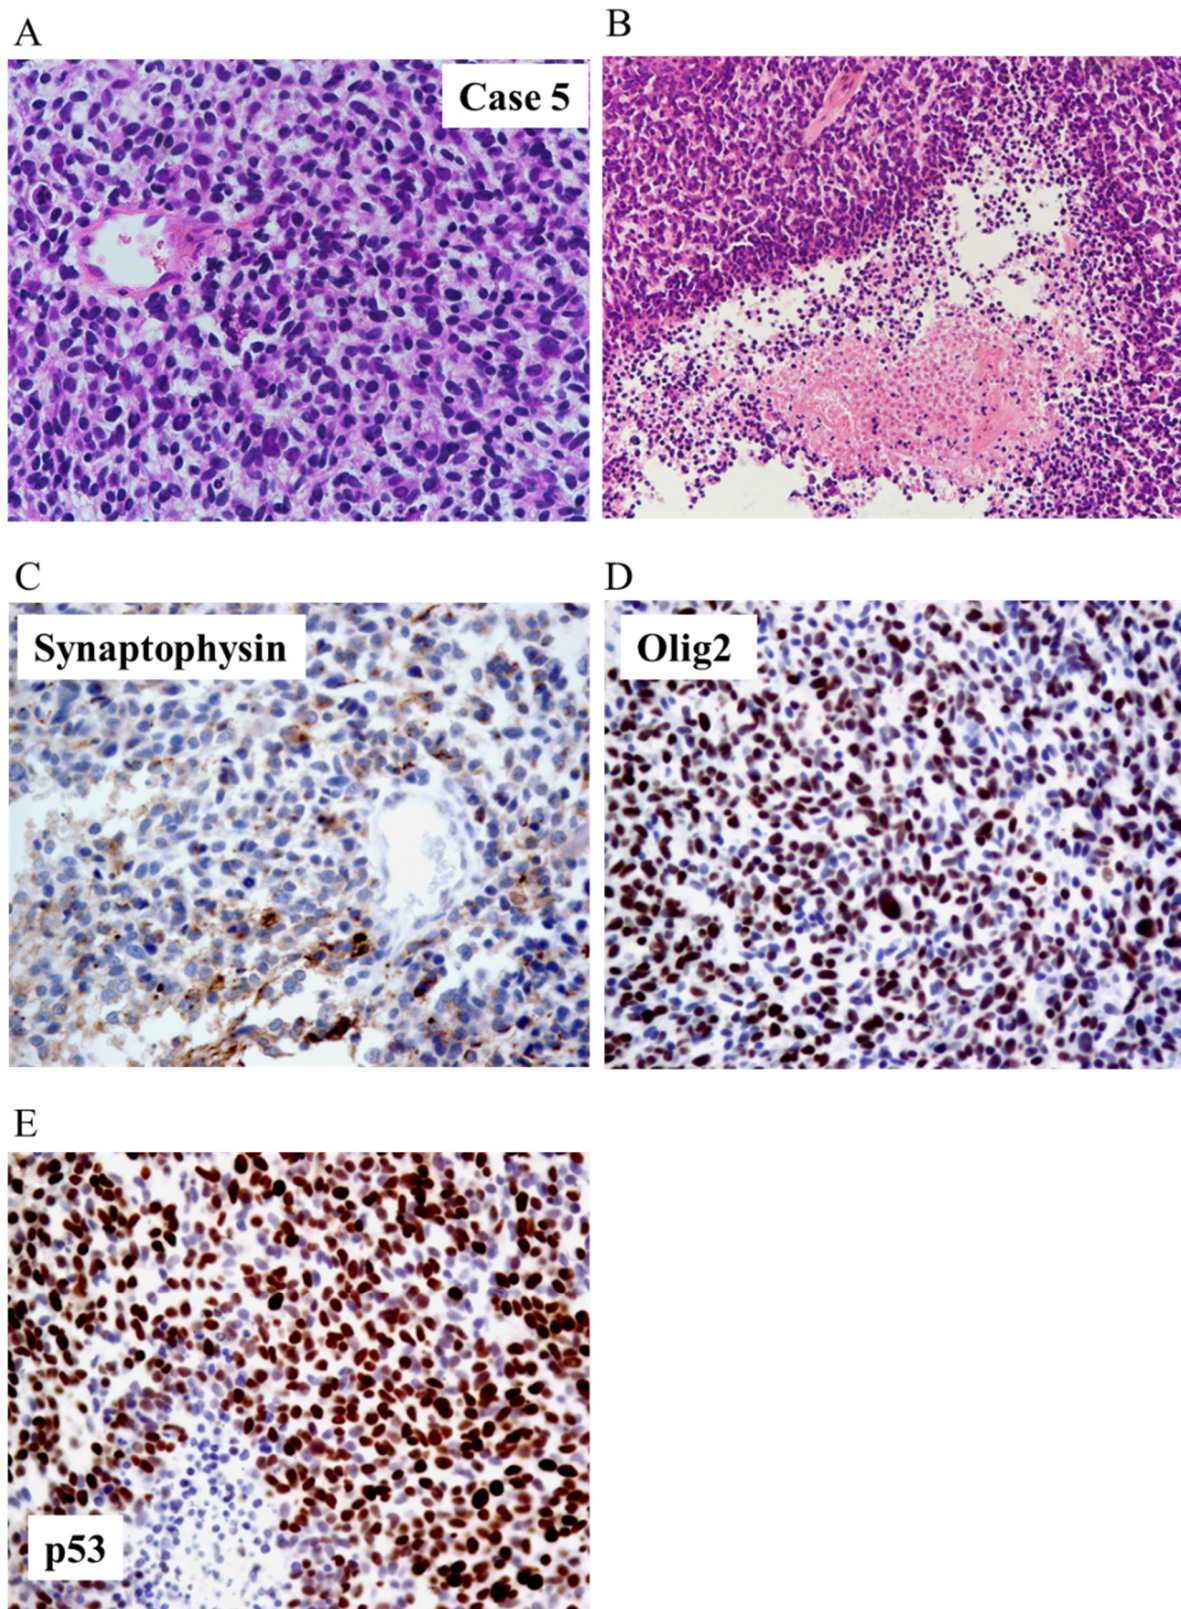

**Figure S1.** (A–E) Case 5. MR images are not available. (A) H&E shows sheets of embryonal cells with scanty cytoplasm, similar to the other cases. (B) necrotic foci are seen ( $\times 200$ ). Immunostaining for (C) synaptophysin ( $\times 400$ ), (D) Olig2 ( $\times 200$ ), and (E) p53 ( $\times 200$ ). Tumor cells were also focally positive for GFAP and negative for NeuN, positive for INI-1, and showed high labeling for Ki67.
